# Supplementary material for: The sugarcane mitochondrial genome: assembly, phylogenetics and transcriptomics
Source: PeerJ journal article supplement (doi:10.7717/peerj.7558), 2019-09-24
Supplement: Supplemental_Document_S4.pdf [file Supplemental_Document_S4.pdf]

Supplemental Document S4 — Protein sequence comparisons of rbcL from sugarcane chloroplasts and mitochondrial assemblies.

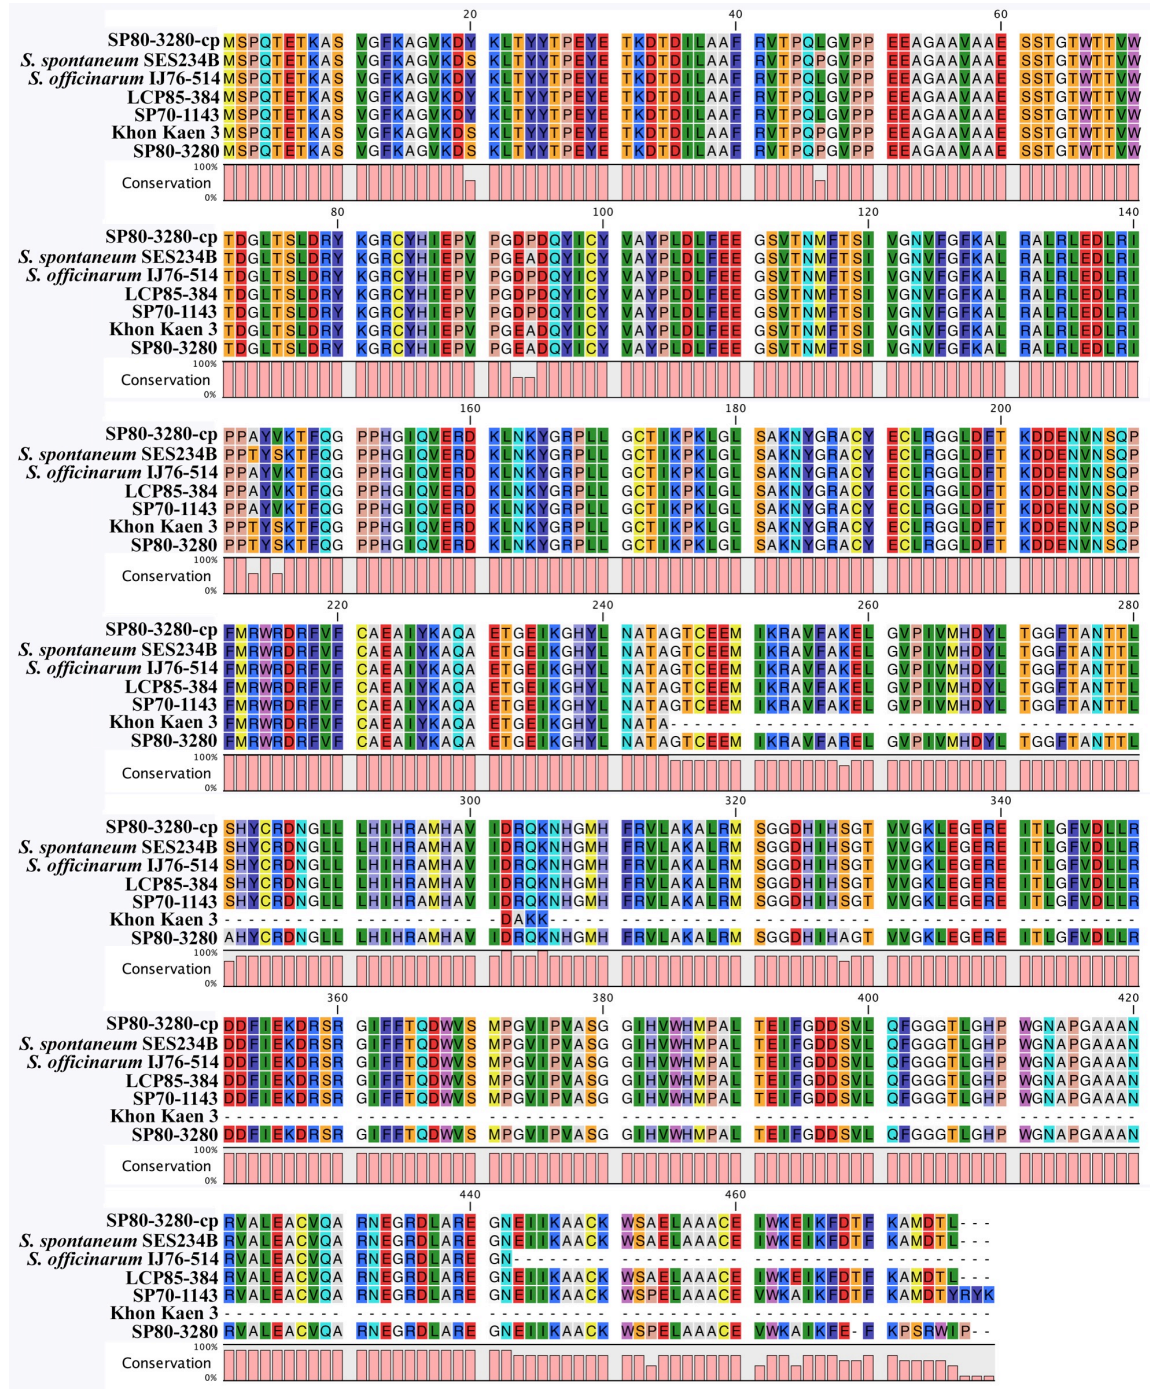

Alignment of the rbcL (Ribulose biphosphate carboxylase large chain precursor) protein sequences from mitochondrial assemblies of the sugarcane cultivars LCP85-383, SP70-1143, Khon Kaen 3 and SP80-3280 along with the mitochondrial assemblies of *Saccharum spontaneum* SS234B and *S. officinarum* IJ76-514. All assemblies are aligned to the

chloroplast sequence of *rbcL* from SP80-3280 (labelled SP80-3280-cp). Alignments were performed with Saté and exported from CLC Sequence Viewer v. 7.
